# Supplementary material for: Bioactive Compounds Extracted from Saudi Dates Using Green Methods and Utilization of These Extracts in Functional Yogurt
Source: MDPI journal article supplement (doi:10.3390/foods12040847), 2023-02-16
Supplement: s1 [file s1]

SUPPLEMENTARY MATERIAL (Figure S1)

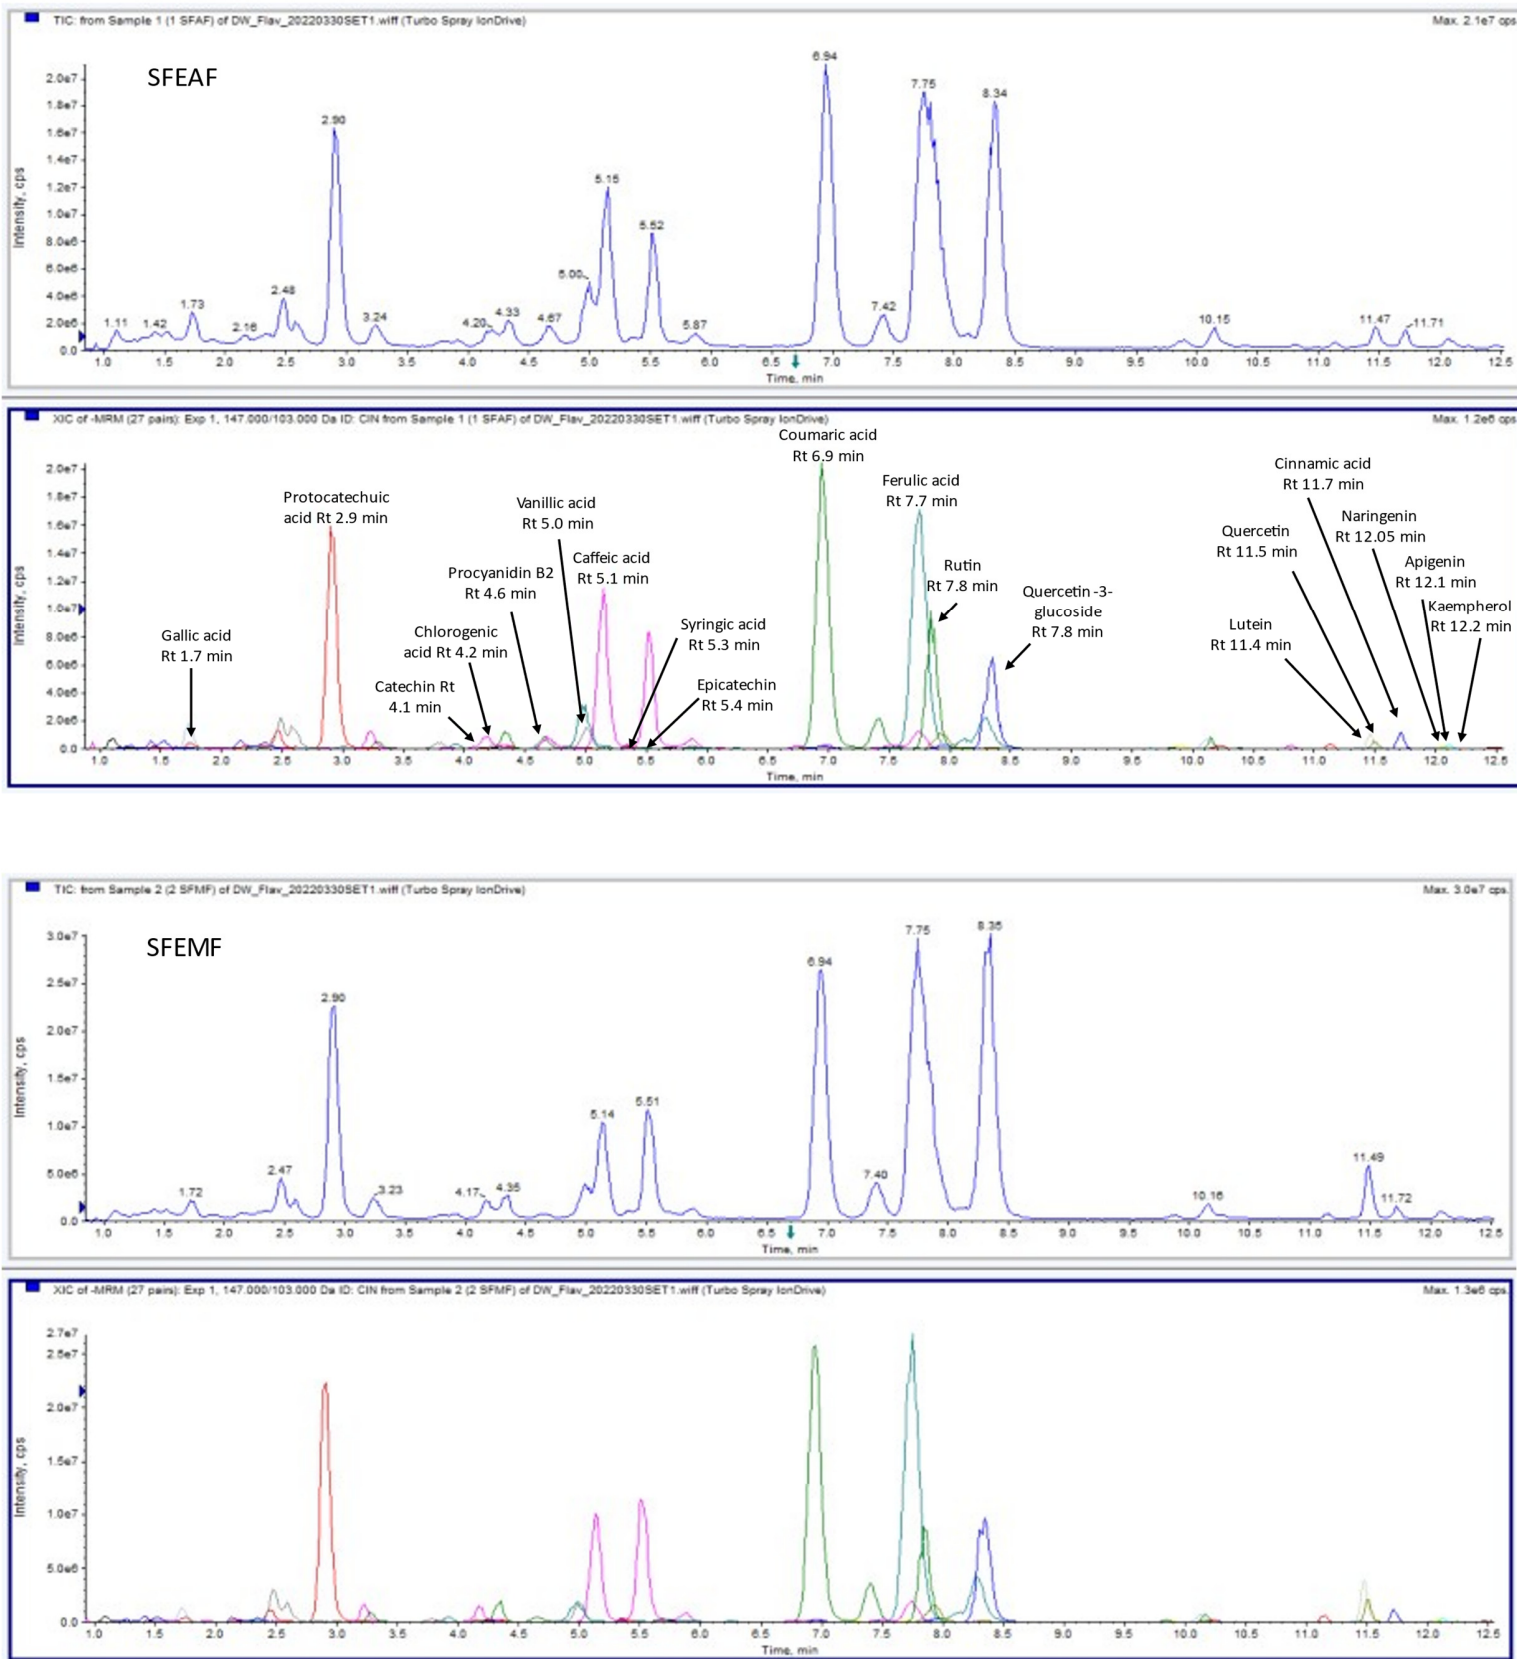

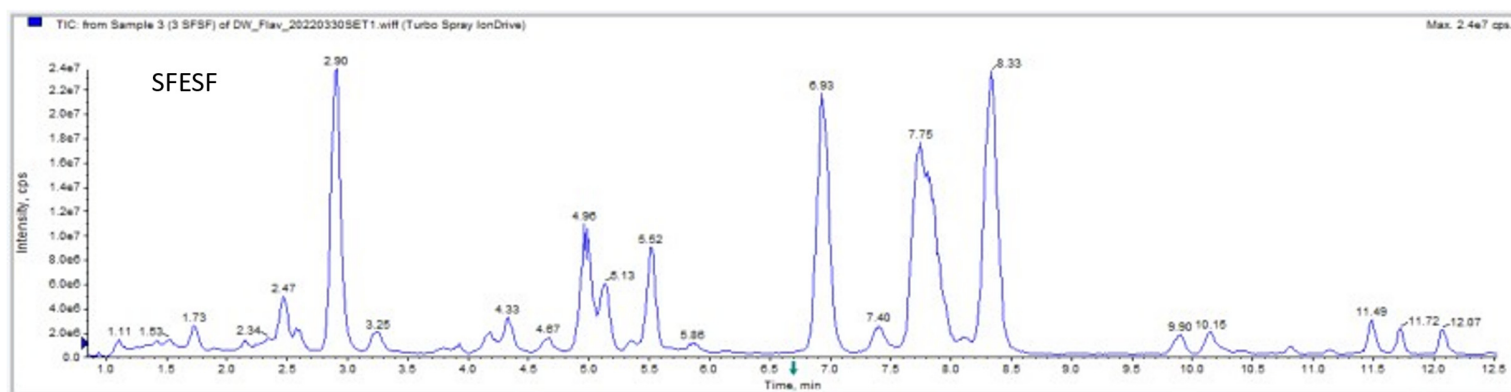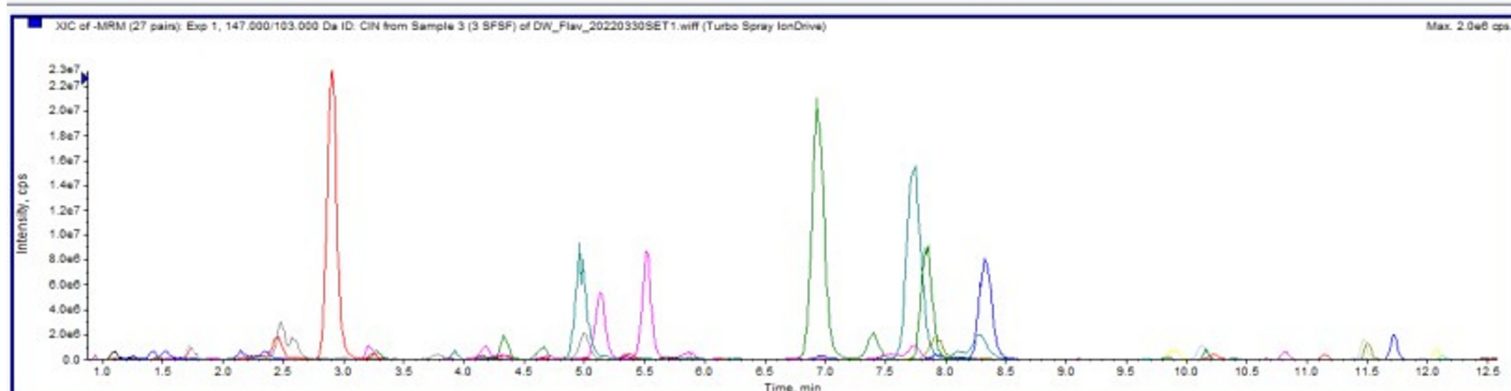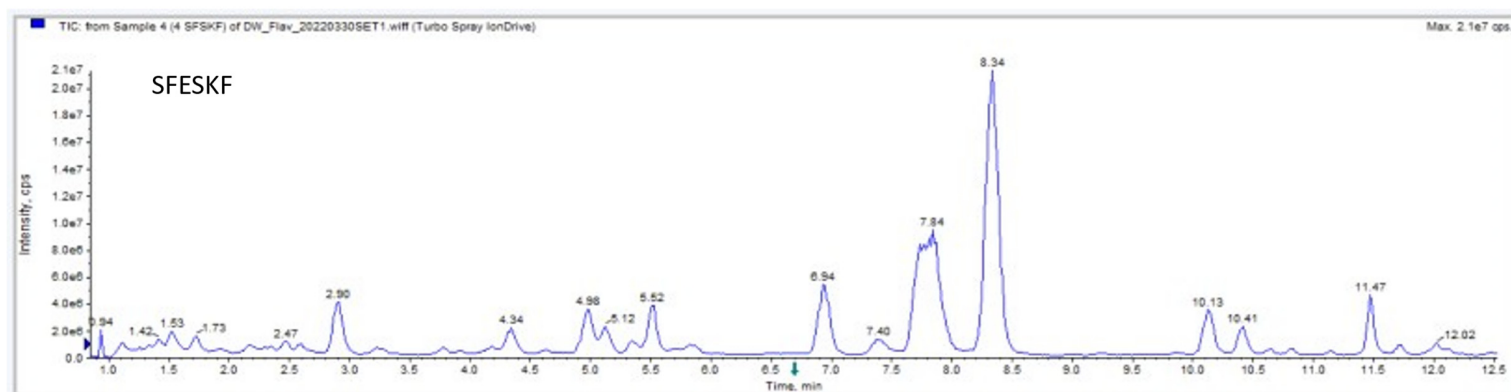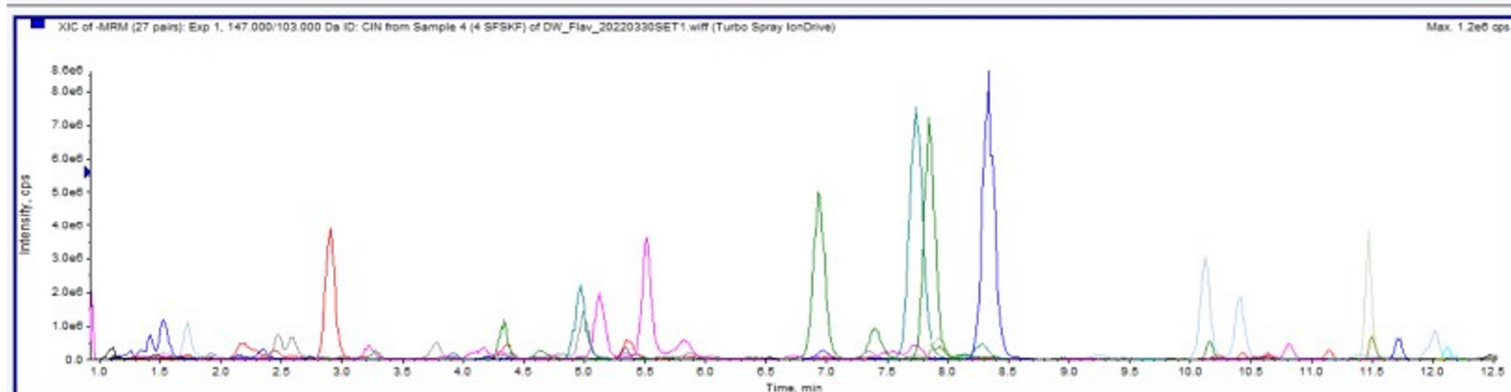

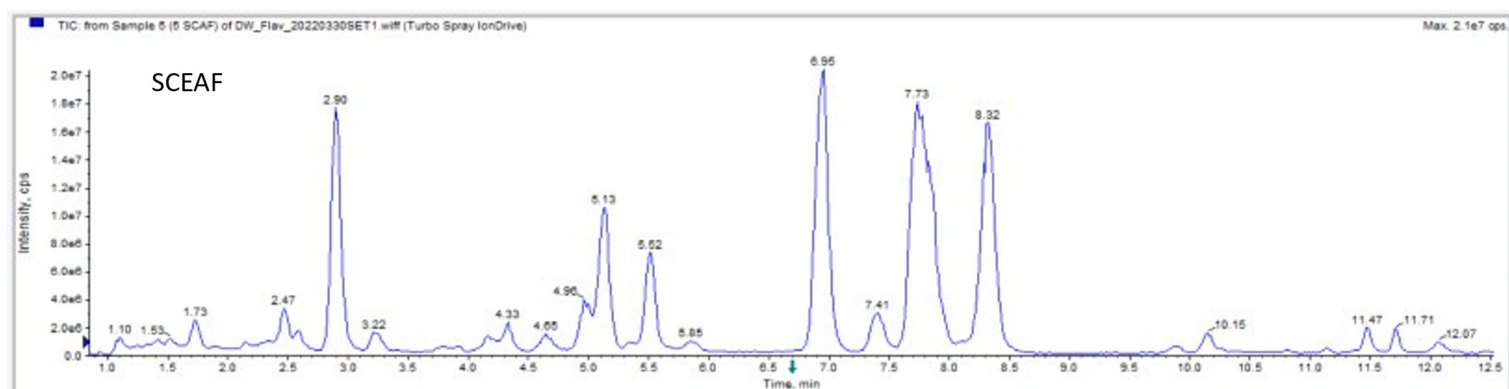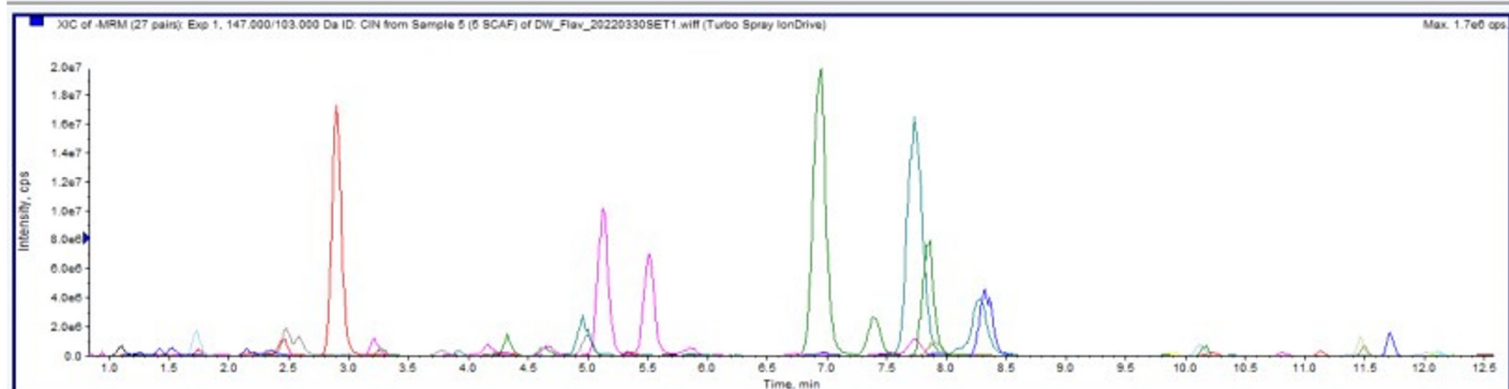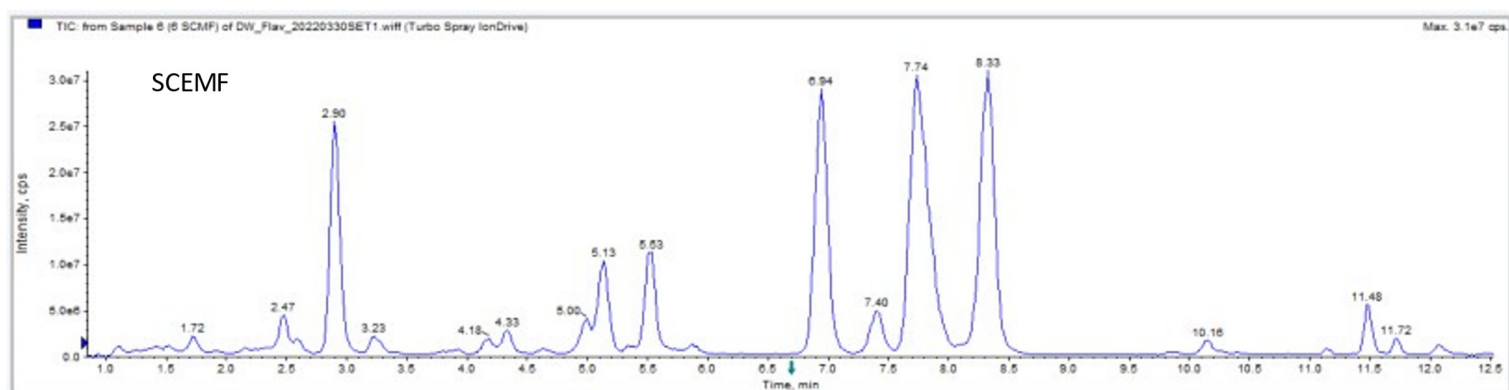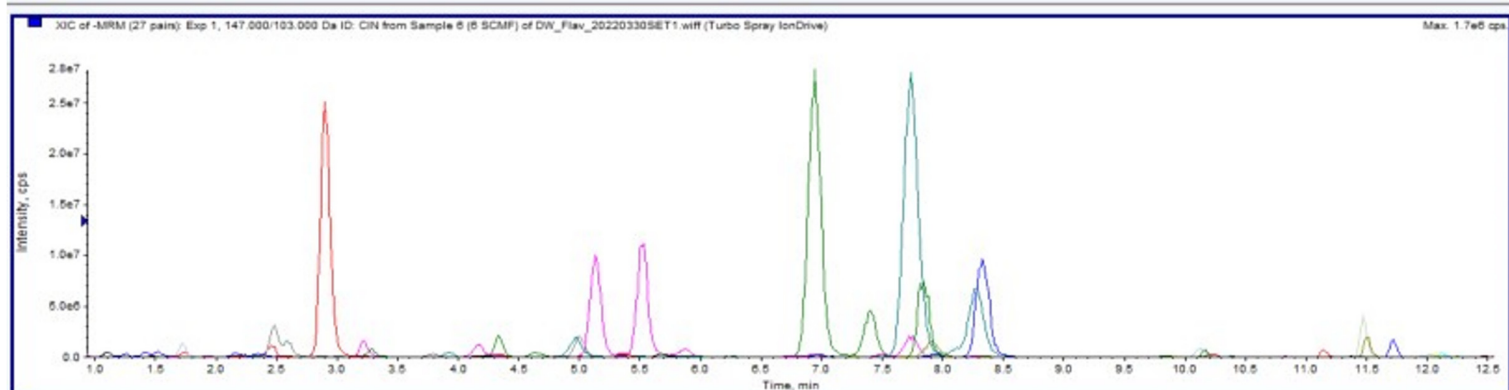

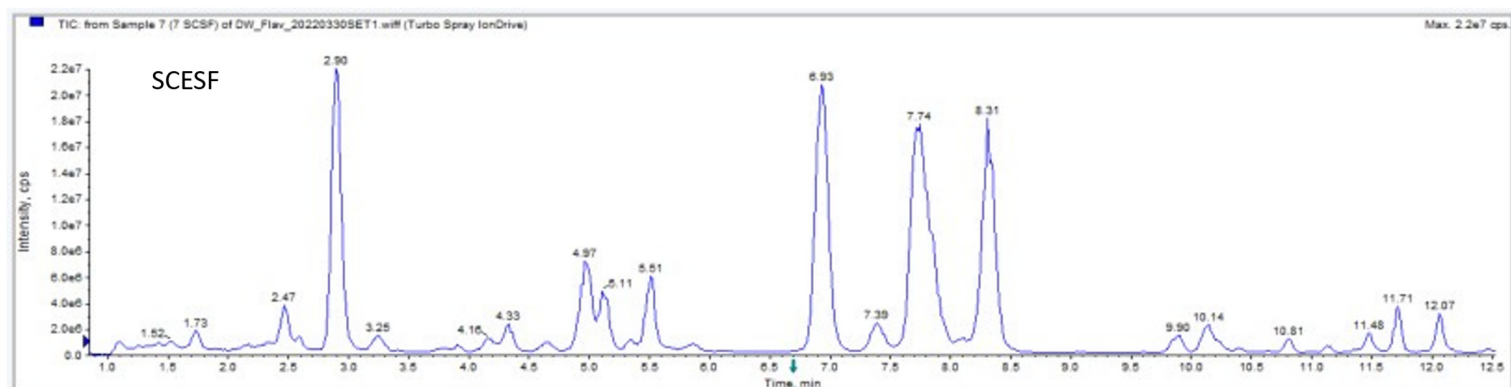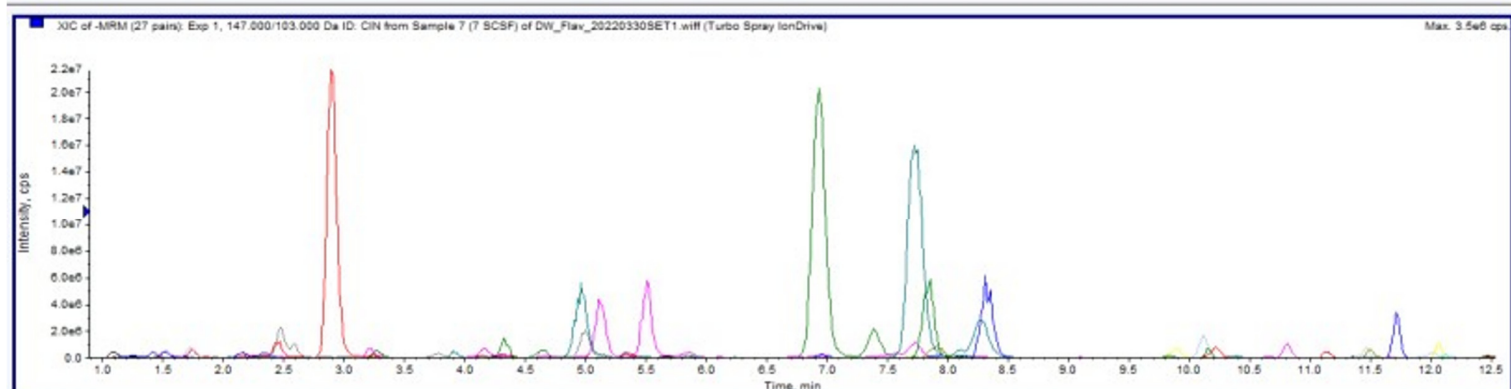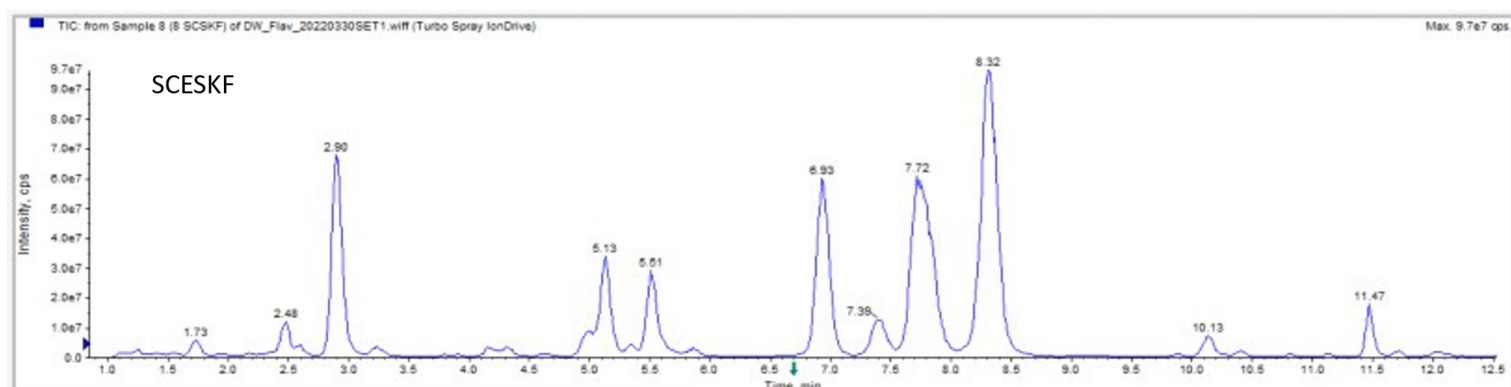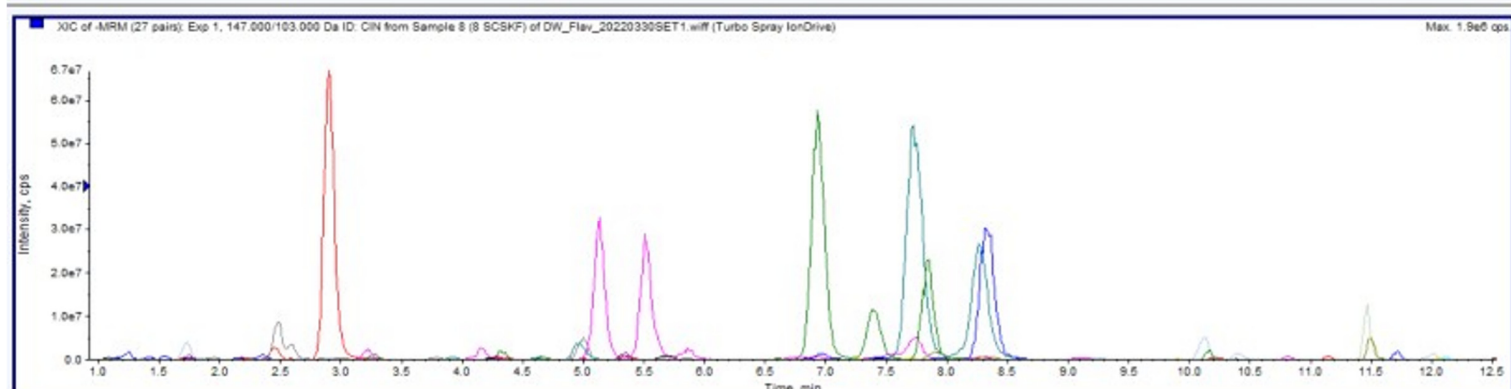



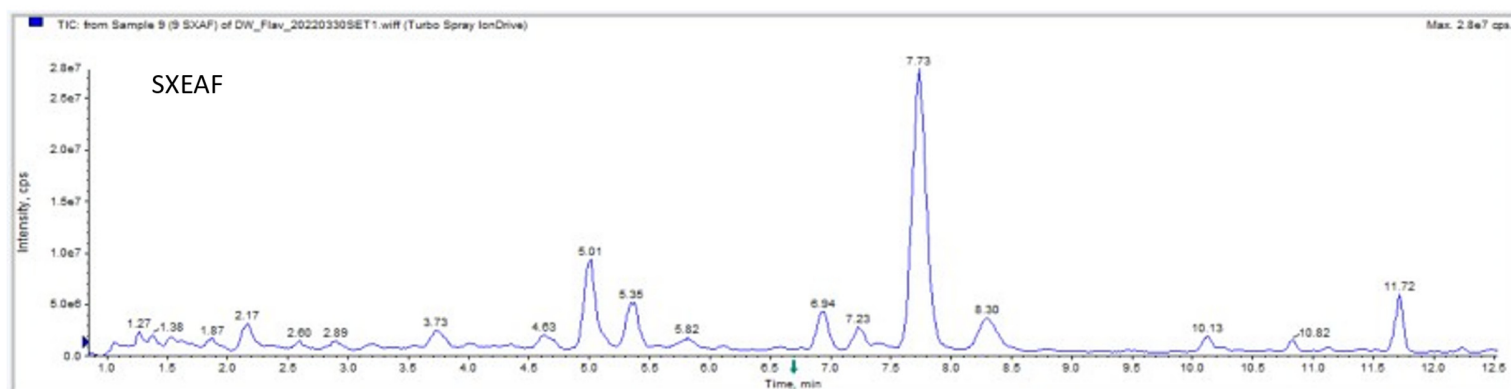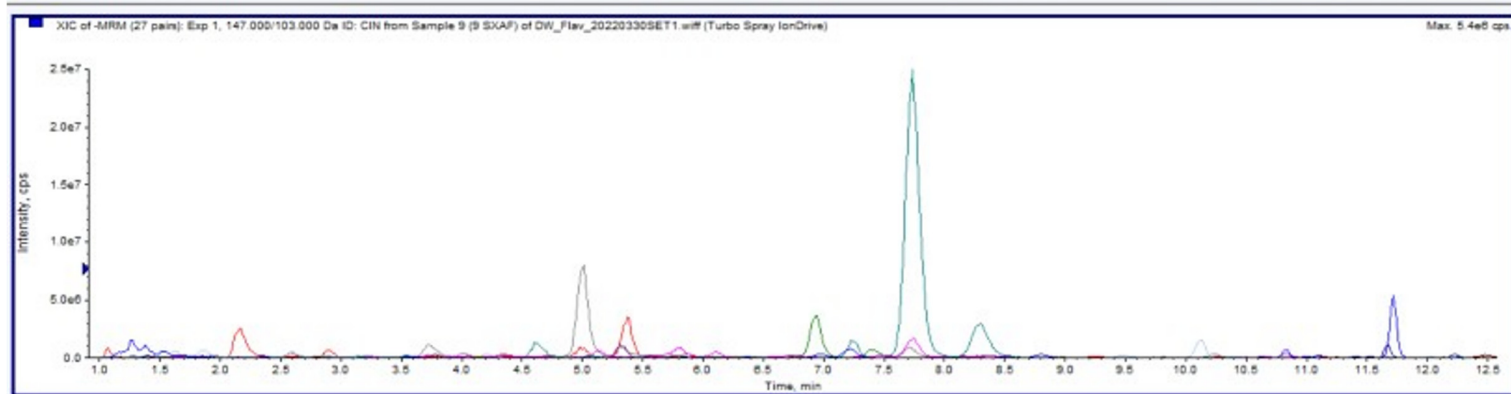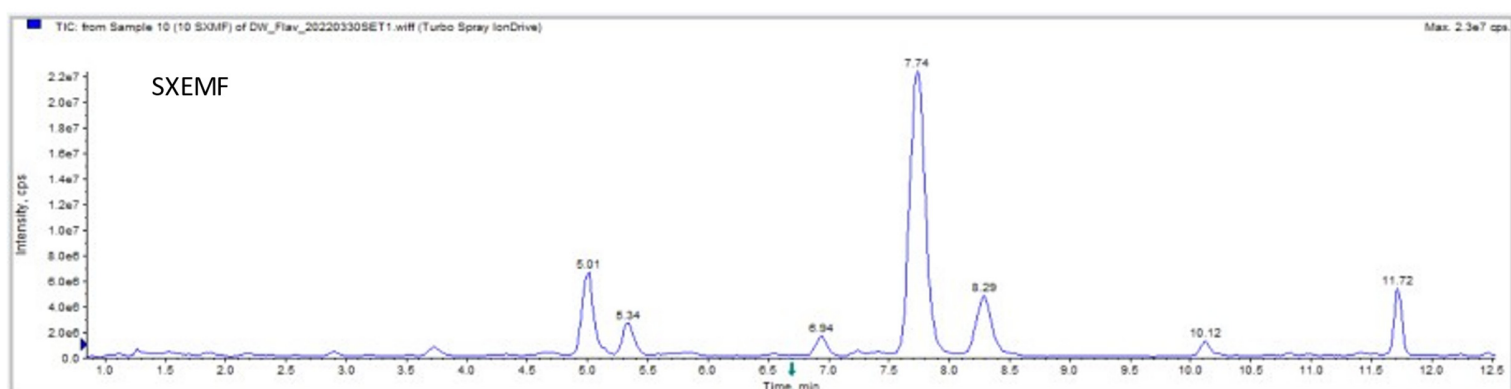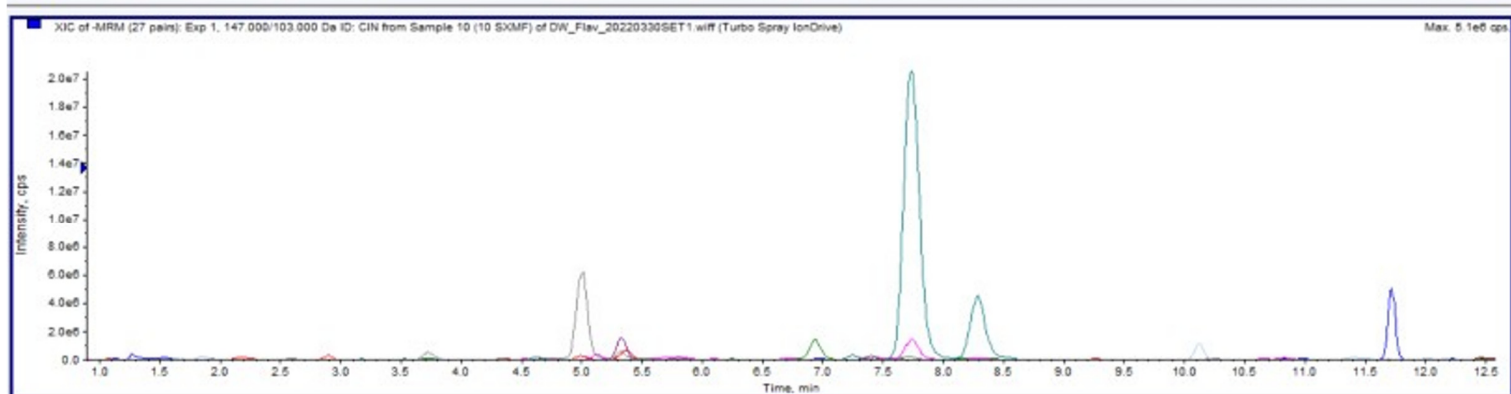

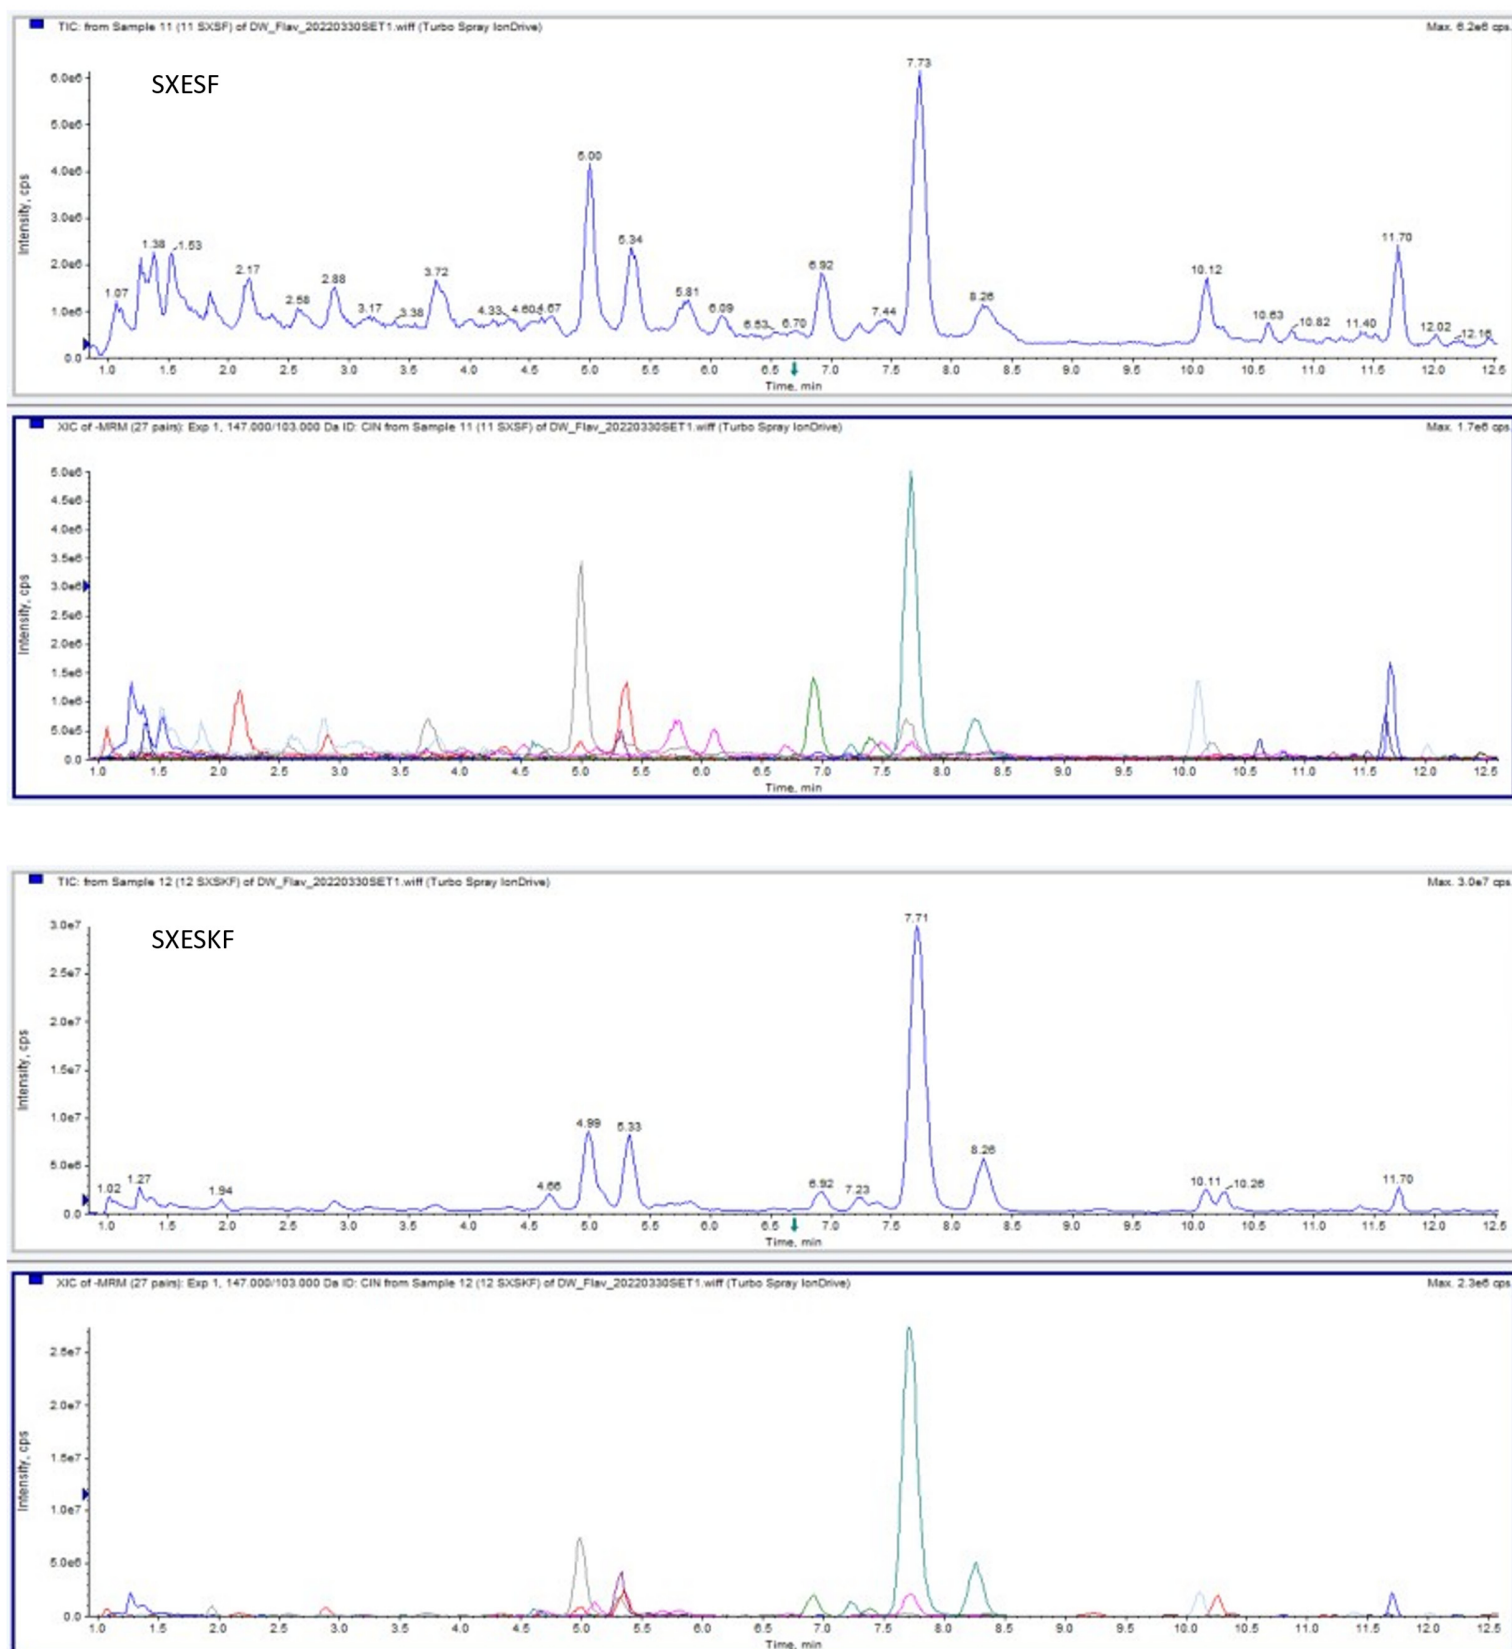

**Figure S1:** LC/MS chromatogram for phenolic acids and flavonoids in extracts from date flesh of four date fruit varieties (Ambara flesh (AF), Majdool flesh (MF), Sagai flesh (SF) and Sukari flesh (SKF)) using supercritical fluid (SFE), subcritical CO<sub>2</sub> (SCE) and Soxhlet (SXE) extraction methods.
